# Supplementary material
Source: PubMed Central journal article supplement (PMC1356541)
Supplement: plntcell_tpc.105.037846_1.pdf [file plntcell_tpc.105.037846_1.pdf]

ACCATCACTCTCTCTCTCTCTCTATTTCCATGGCTCTTGTTCGTAACGC  
M A L V R K R  
CGTCAATCAACCTCGCTCCCTGTCACCGCTCTCTGTTCACCTCCCTGGTCTCC  
R Q I N L R L P V P P L S V H L P W F S  
TTTCCTCATCCACCCCCCTCATCAACACGGATCTCAGCTCCGATTCGAGAA  
F A S S T A P V I N N G I S A S D V E K  
CTCCACGTTCTCGGAAGGAAGCAGCGGGATCGTATACAAAGTCCACCACAAACCAG  
L H V L G R G S S G I V Y K V H H K T T  
GGGGAGATACGCTCTGAATCAGTCAACGGCGACATGATCCTGCTTTCACAAGCAA  
G E I Y A L E S V N G D M S P A F T R Q  
TTAGCCCGGAGATGGAGATCTCCGTCGACGGATCTCCTTATGTGTAGGTGCAA  
L A R E M E I L R R T D S P Y V V R C Q  
GGATCTTCGAGAACCAATCGTCGGAGGTTTCGATCCTCATGGAGTATATGGACGGT  
G I F E K P I V G E V S I L M E Y M D G  
GGAAACCTAGAATCTCTCCGGCGCGCTTACGGAGAAACAAGCGGGATTTCCCGC  
G N L E S L R G A V T E K Q L A G F S R  
CAGATTTGAAAGGTTAAGTTATCTCCACTCACTCAAGATCGTTACAGAGACATCAA  
Q I L K G L S Y L H S L K I V H R D I K  
CTCCGAATCTACTCTTAACCTCGAAGCAAGTAAATCGCTGATTTGGAGTGAGC  
P A N L L E N S R N E V K I A D F G V S  
AAAATCATTACCCGATCGTTAGATTACTGCAATTCCTACGTCGGCACTTGGCTTACATG  
K I I T R S L D Y C N S Y V G T C A Y M  
AGCCCGGAGAGATTTGACTCTGCCCGGGAGAAAACCTCCGATGTTTACGCAGCGATATC  
S P E R F D S A A G E N S D V Y A G D I  
TGGAGTTCCGAGTGTGATCTTGAGCTCTCCGTCGGACATTTCCGTTGCTTCTCAG  
W S F G V M I L E L F V G H P P L P Q  
GGACAGAGACTGACTGGCGACGTTAATGTGCGTCTGTGCTTTGGAGAACCCCGGT  
G O R P D W A T L M C V V C F G E P P R  
CGCCCGAAGGATGTTCCGACGAGTTAGGAGTTTGTGACTGTTGTCTCCGTAAGAA  
A P E G C S D E F R S F V D C C L R K E  
TCGAGTGAGAGGTGGACGGGTCGACGCTCTCCGGTACCCCTTTCTCCGTGAAGTCTT  
S S E R W T A S O L L G H P P L R E S L  
TAGATCCGACTCTCTGATATTACGGGTCGGATATTTCCGGGTACCCAAATCGCAA  
TTATTATTTTTGTAGAATTTTTGTATGATCAGAAATGCTCTATTGAAATTCATCTG  
ACGATTCATATT
