# Supplementary material
Source: PubMed Central journal article supplement (PMC1356541)

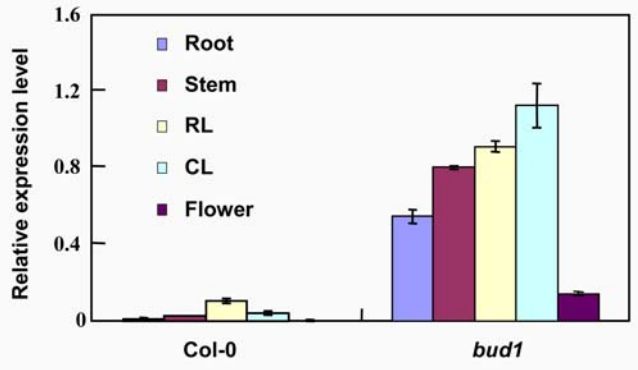

Supplement: plntcell_tpc.105.037846_2.pdf [file plntcell_tpc.105.037846_2.pdf]
